# Supplementary material for: Catalytic and antibacterial activities of novel colored zinc borophosphate glasses
Source: Royal Society of Chemistry journal article supplement (doi:10.1039/c6ra17232f), 2016-01-01
Supplement: c6ra17232f1.pdf [file c6ra17232f1.pdf]

(S1)

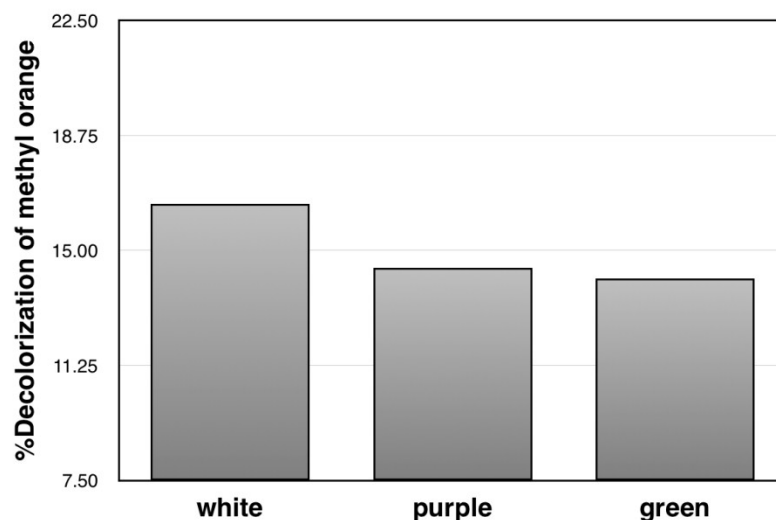

S1 : Photobleaching of methyl orange under UV irradiation for 24 hours, without  $\text{H}_2\text{O}_2$  addition

(S2)

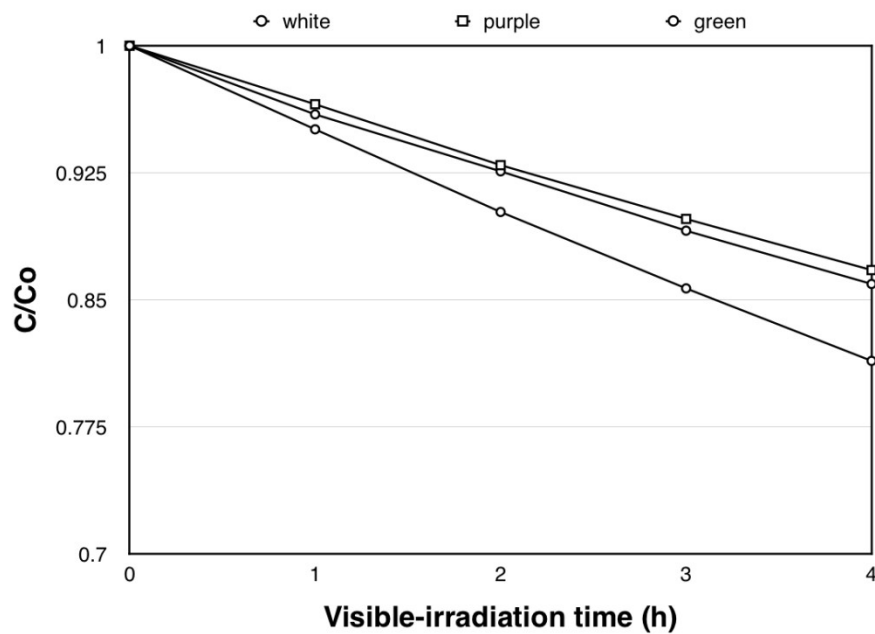

S2 : Photobleaching of methyl orange in the presence of  $\text{H}_2\text{O}_2$  under visible light irradiation

S3

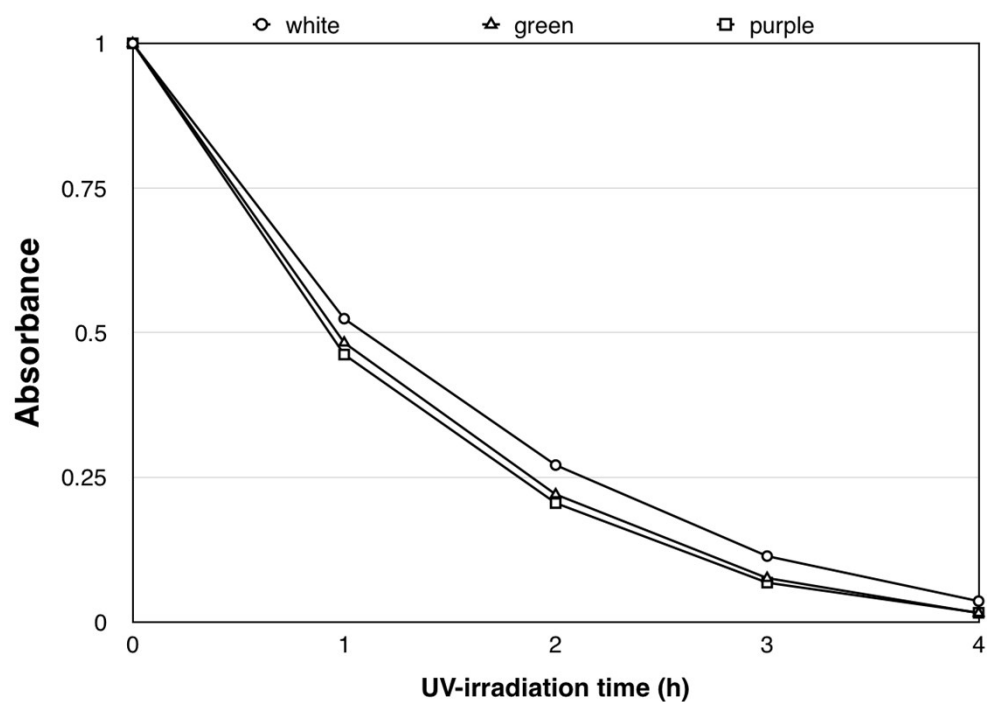

S2 : Photobleaching of methyl orange in the presence of  $H_2O_2$  with UV irradiation of new composition coloured ZBP glasses ( 50 mol% ZnO concentration)

S4

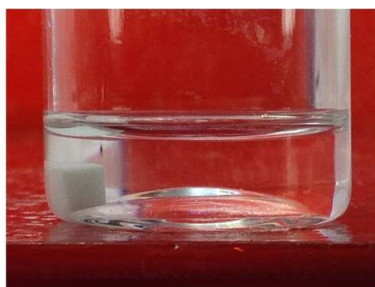

acrylamide + UV 24 h

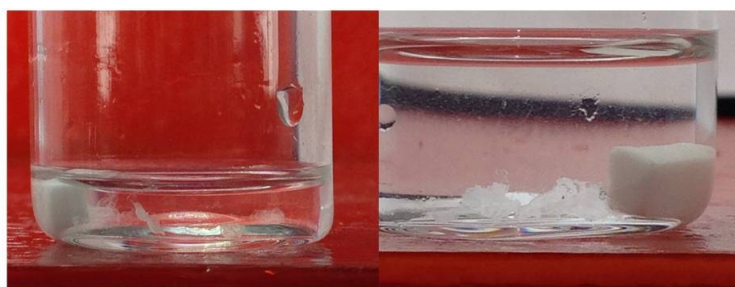

ZBP + acrylamide + UV 24 h

S4 : Polyacrylamide prepared by radical polymerization initiating using the synthesized white ZBP glass
